# Supplementary material for: Effect of the electron donating group on the excited-state electronic nature and epsilon-near-zero properties of curcuminoid-borondifluoride dyes
Source: Royal Society of Chemistry journal article supplement (doi:10.1039/d1ra08025c), 2021-01-01
Supplement: d1ra08025c1.pdf [file d1ra08025c1.pdf]

## Supporting Information

### Effect of the electron donating group on excited-state electronic nature and epsilon-near-zero properties of curcuminoid-borondifluoride dyes

*Kyu-Ri Choi<sup>1</sup>, Dae Hyeon Kim<sup>1</sup>, Yeon Ui Lee<sup>2</sup>, Virginie Placide<sup>1</sup>, Steven Huynh<sup>1</sup>, Dandan Yao<sup>3</sup>, Gabriel Canard<sup>3</sup>, Elena Zaborova<sup>3</sup>, Fabrice Mathevet<sup>4,7</sup>, Loïc Mager,<sup>5</sup> Benoît Heinrich<sup>5</sup>, Jean-Charles Ribierre<sup>6</sup>, Jeong Weon Wu,<sup>1\*</sup> Frédéric Fages,<sup>3\*</sup> Anthony D'Aléo<sup>3,5\*</sup>*

<sup>1</sup> *Department of Physics, Ewha Womans University, Seoul 03760, Republic of Korea*

<sup>2</sup> *Department of Physics, Chungbuk National University, Chungbuk 28644, Republic of Korea*

<sup>3</sup> *Aix Marseille Univ, CNRS, CINaM UMR 7325, Campus de Luminy, Case 913, 13288 Marseille, France*

<sup>4</sup> *Sorbonne Universités, Faculté des Sciences, CNRS, Parisien de Chimie Moléculaire (IPCM), UMR 8232, Chimie des Polymères, 75005 Paris, France*

<sup>5</sup> *Université de Strasbourg, CNRS, Institut de Physique et Chimie des Matériaux de Strasbourg, UMR 7504, F-67000 Strasbourg, France*

<sup>6</sup> *Center for Organic Photonics and Electronics Research (OPERA), Kyushu University, Fukuoka 819-0395, Japan*

## **Contents**

1. Table of spectroscopic data and photophysical properties
2. Cyclic voltammetry data
3. Squaraine solvatochromism
4. Grazing incidence wide angle x-ray scattering (GIWAXS)
5. Spectroscopic ellipsometry measurement
6. Reflection, transmission, absorption measurements and FDTD data

## 1. Table of spectroscopic data and photophysical properties

Absorption spectra was measured on Hitachi spectrophotometer U-3900, a double beam single monochromator system. Fluorescence spectra was measured on Horiba Jobin Yvon fluorimeter FluoroMax-4.

**Table S1.** Spectroscopic data and photophysical properties of compounds **1**, **2** and **3** in solvents of different polarity at room temperature<sup>a</sup>

| solvent           | <b>1</b>               |                       |                  | <b>2</b>               |                       |                  | <b>3</b>               |                       |                  |
|-------------------|------------------------|-----------------------|------------------|------------------------|-----------------------|------------------|------------------------|-----------------------|------------------|
|                   | $\lambda_{\text{abs}}$ | $\lambda_{\text{em}}$ | $\Delta\nu_{ST}$ | $\lambda_{\text{abs}}$ | $\lambda_{\text{em}}$ | $\Delta\nu_{ST}$ | $\lambda_{\text{abs}}$ | $\lambda_{\text{em}}$ | $\Delta\nu_{ST}$ |
| Cyclo             | 514                    | 540                   | 937              | 560                    | 583                   | 704              | 612                    | 639                   | 690              |
| CCl <sub>4</sub>  | 522                    | 558                   | 1236             | 565                    | 601                   | 1060             | 626                    | 665                   | 937              |
| Bu <sub>2</sub> O | 511                    | 585                   | 2475             | 564                    | 614                   | 1444             | 622                    | 668                   | 1107             |
| Et <sub>2</sub> O | 506                    | 607                   | 3288             | 562                    | 635                   | 2046             | 624                    | 673                   | 1167             |
| Chloroform        | 524                    | 652                   | 3747             | 593                    | 698                   | 2537             | 661                    | 731                   | 1449             |
| BuOAc             | 507                    | 642                   | 4148             | 567                    | 657                   | 2416             | 631                    | 690                   | 1355             |
| EtOAc             | 504                    | 668                   | 4871             | 568                    | 677                   | 2834             | 636                    | 699                   | 1417             |
| DCM               | 516                    | 709                   | 5275             | 595                    | 735                   | 3201             | 665                    | 749                   | 1686             |
| DCE               | 519                    | 716                   | 5301             | 594                    | 732                   | 3174             | 665                    | 750                   | 1704             |
| Acetone           | 507                    | 763                   | 6618             | 580                    | 730                   | 3543             | 651                    | 729                   | 1644             |
| ACN               | 507                    | 805                   | 7302             | 583                    | 770                   | 4166             | 661                    | 756                   | 1901             |

<sup>a</sup> Absorption maximum wavelengths  $\lambda_{\text{abs}}$  (nm). Fluorescence maximum wavelengths  $\lambda_{\text{em}}$  (nm). Stokes shifts  $\Delta\nu_{ST}$  (cm<sup>-1</sup>). Cyclo: Cyclohexane. CCl<sub>4</sub>: Carbon tetrachloride. Bu<sub>2</sub>O: n-Dibutylether. Et<sub>2</sub>O: Diethyl ether. BuOAc : n-Butylacetate. EtOAc: Ethyl acetate. DCM: Dichloromethane. DCE: 1,2-Dichloroethane. ACN: Acetonitrile.

**Table S2.** Spectroscopic data and photophysical properties of compounds **4**, **5** and **6** in solvents of different polarity at room temperature<sup>a</sup>

| solvent           | <b>4</b>               |                       |                   | <b>5</b>               |                       |                   | <b>6</b>               |                       |                   |
|-------------------|------------------------|-----------------------|-------------------|------------------------|-----------------------|-------------------|------------------------|-----------------------|-------------------|
|                   | $\lambda_{\text{abs}}$ | $\lambda_{\text{em}}$ | $\Delta \nu_{ST}$ | $\lambda_{\text{abs}}$ | $\lambda_{\text{em}}$ | $\Delta \nu_{ST}$ | $\lambda_{\text{abs}}$ | $\lambda_{\text{em}}$ | $\Delta \nu_{ST}$ |
| Cyclo             | 562                    | 575                   | 402               | 594                    | 606                   | 333               | 620                    | 637                   | 430               |
| CCl <sub>4</sub>  | 574                    | 601                   | 783               | 610                    | 630                   | 520               | 633                    | 659                   | 623               |
| Bu <sub>2</sub> O | 574                    | 602                   | 810               | 608                    | 640                   | 901               | 636                    | 666                   | 708               |
| Et <sub>2</sub> O | 576                    | 616                   | 1127              | 609                    | 641                   | 820               | 640                    | 675                   | 810               |
| Chloroform        | 609                    | 677                   | 1649              | 643                    | 684                   | 932               | 682                    | 729                   | 945               |
| BuOAc             | 586                    | 641                   | 1464              | 625                    | 655                   | 733               | 655                    | 693                   | 837               |
| EtOAc             | 591                    | 651                   | 1559              | 625                    | 661                   | 871               | 660                    | 701                   | 886               |
| DCM               | 620                    | 698                   | 1802              | 649                    | 694                   | 999               | 692                    | 742                   | 974               |
| DCE               | 620                    | 702                   | 1884              | 651                    | 696                   | 993               | 695                    | 744                   | 948               |
| Acetone           | 609                    | 689                   | 1907              | 641                    | 683                   | 959               | 681                    | 726                   | 910               |
| ACN               | 618                    | 713.5                 | 2166              | 652                    | 697                   | 990               | 696                    | 748                   | 998               |

<sup>a</sup> Absorption maximum wavelengths  $\lambda_{\text{abs}}$  (nm). Fluorescence maximum wavelengths  $\lambda_{\text{em}}$  (nm). Stokes shifts  $\Delta \nu_{ST}$  (cm<sup>-1</sup>). ; Cyclo: Cyclohexane. CCl<sub>4</sub>: Carbon tetrachloride. Bu<sub>2</sub>O: n-Dibutylether. Et<sub>2</sub>O: Diethyl etherethylic ether. BuOAc : n-Butylacetate. EtOAcAcOEt: Eethyl acetate. DCM: Ddichloromethane. DCE: 1.2-Ddichloroethane. ACN: Aacetoneitrile.

**Table S3.** Dielectric constant ( $\epsilon$ ), refractive index (n) and orientation polarizability ( $\Delta f^*$ ) of 11 solvents.

|              |                      |                                          |                                    |                                   |                                 |                        |
|--------------|----------------------|------------------------------------------|------------------------------------|-----------------------------------|---------------------------------|------------------------|
|              | Cyclohexane (Cyclo)  | Carbon tetrachloride (CCl <sub>4</sub> ) | n-Dibutylether (Bu <sub>2</sub> O) | Diethyl ether (Et <sub>2</sub> O) | Chloroform (CHCl <sub>3</sub> ) | n-Butylacetate (BuOAc) |
| $\epsilon$   | 2.02                 | 2.24                                     | 3.1                                | 4.33                              | 4.81                            | 5.07                   |
| n            | 1.426                | 1.416                                    | 1.399                              | 1.352                             | 1.443                           | 1.392                  |
| $\Delta f^*$ | 0.1,                 | 0.118                                    | 0.196                              | 0.251                             | 0.251                           | 0.269                  |
|              | Ethylacetate (EtOAc) | Dichloromethane (DCM)                    | Dichloroethane (DCE)               | Acetone                           | Acetonitrile (ACN)              |                        |
| $\epsilon$   | 6.02                 | 8.93                                     | 10.5                               | 20.7                              | 37.5                            |                        |
| n            | 1.372                | 1.424                                    | 1.445                              | 1.359                             | 1.344                           |                        |
| $\Delta f^*$ | 0.292                | 0.319                                    | 0.326                              | 0.374                             | 0.393                           |                        |

## 2. Cyclic voltammetry data

Cyclic voltammetry (CV) data were acquired using a BAS 100 Potentiostat (Bioanalytical Systems) and a PC computer containing BAS100W software (v2.3). A three-electrode system with a Pt working electrode (diameter 1.6 mm), a Pt counter electrode and a Ag/AgCl (with a 3 M NaCl filling solution) reference electrode was used. (n-Bu)<sub>4</sub>NPF<sub>6</sub> (0.1 M in CH<sub>2</sub>Cl<sub>2</sub>) served as an inert electrolyte. Cyclic voltammograms were recorded at a scan rate of 100 mV s<sup>-1</sup> for solution of dyes at a concentration of *ca.* 10<sup>-3</sup> M. Ferrocene was used as an internal standard

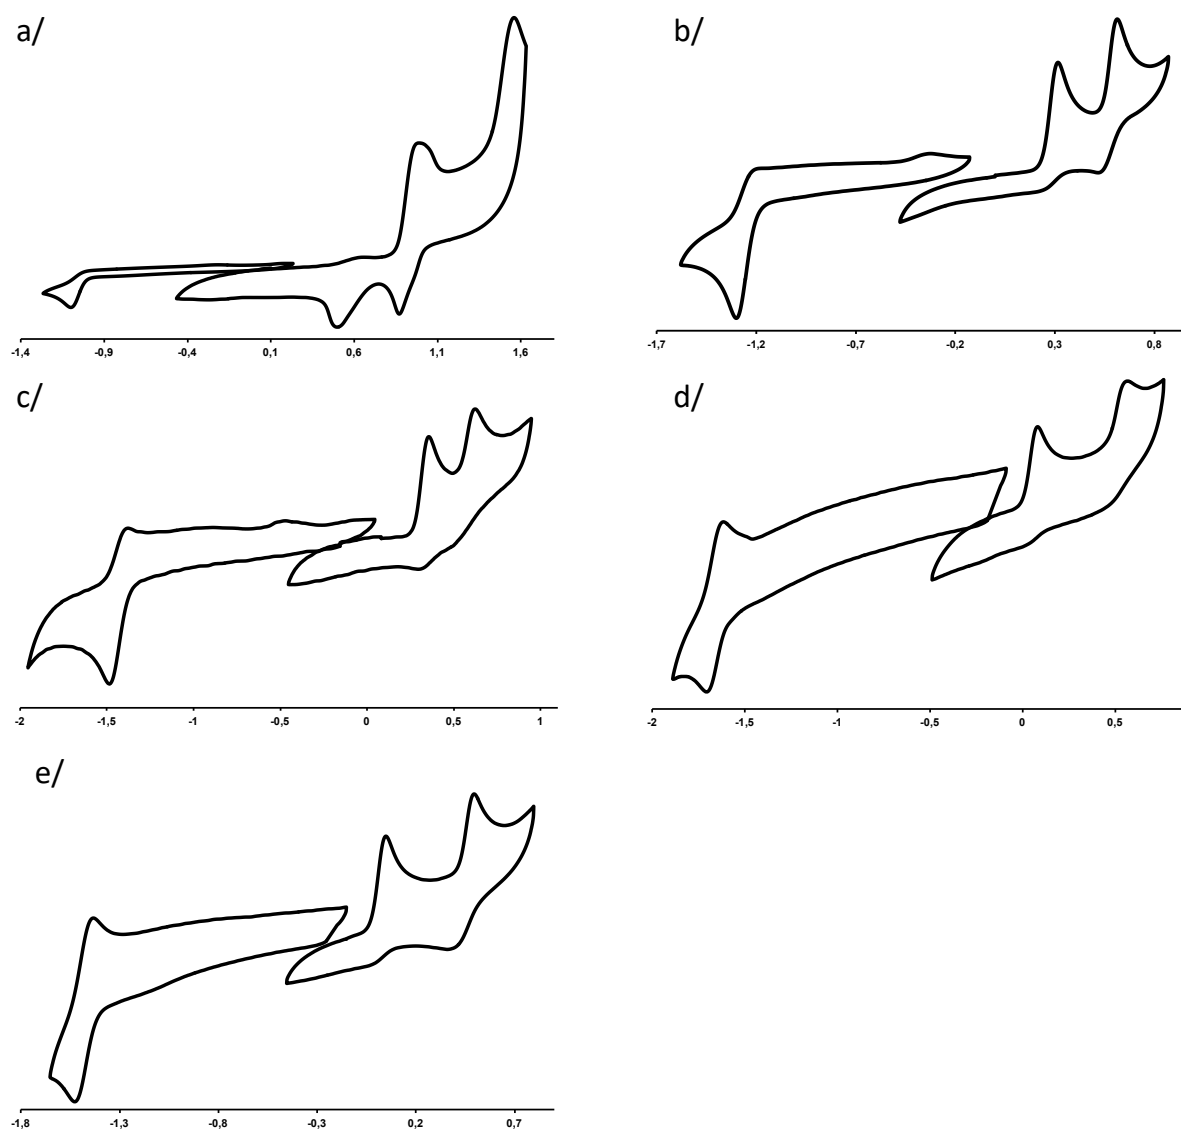

**Figure S1|** Cyclic voltammograms of **1** (a/), **3** (b/), **4** (c/), **5** (d/) and **6** (e/) in dichloromethane solution containing 0.1 M of (n-Bu)<sub>4</sub>NPF<sub>6</sub> (scan rate of 100 mV s<sup>-1</sup>).

### 3. Solvatochromism of polymethine model squaraine

Molecular structure of polymethine model squaraine is shown in Figure S2, named as compound 7.

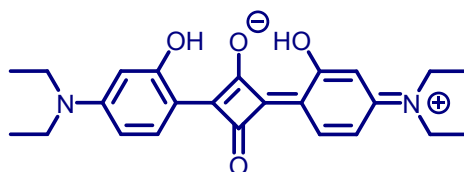

**Figure S2** | Molecular structure of polymethine model squaraine, compound 7.

Solvatochromism of compound 7 is shown in Figure S3.

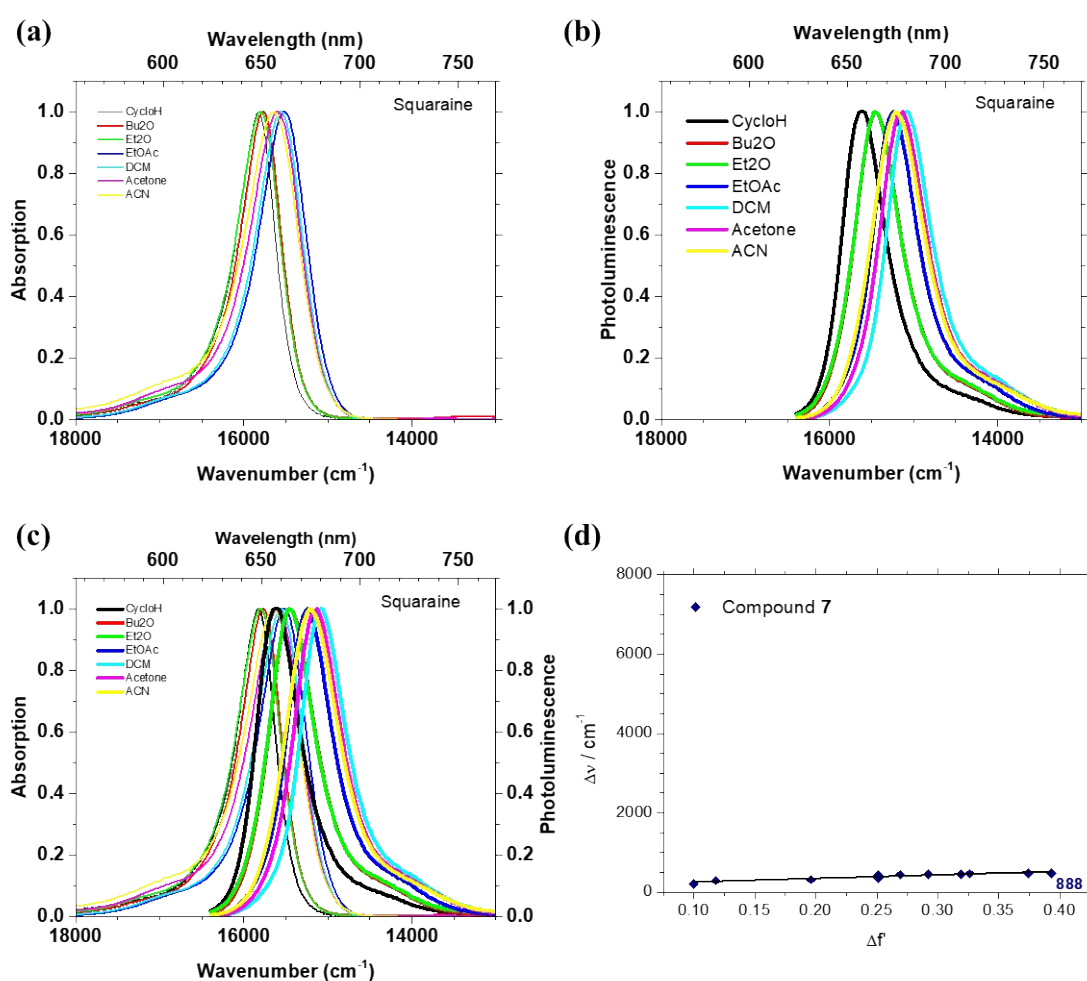

**Figure S3** | Solvatochromism of polymethine model squaraine 7. (a) and (b) show spectra of normalized absorption and normalized photoluminescence in 7 solvents with different polarity, namely, Cyclohexane (Cyclo), Bu<sub>2</sub>O (dibutyl ether), Diethyl ether (Et<sub>2</sub>O), Ethyl acetate (EtOAc), Dichloromethane (DCM), Acetone, Acetonitrile (ACN). (c) shows Stokes shift. (d) is the Lippert-Mataga plot of compound 7.

#### 4. Grazing incidence wide angle x-ray scattering (GIWAXS)

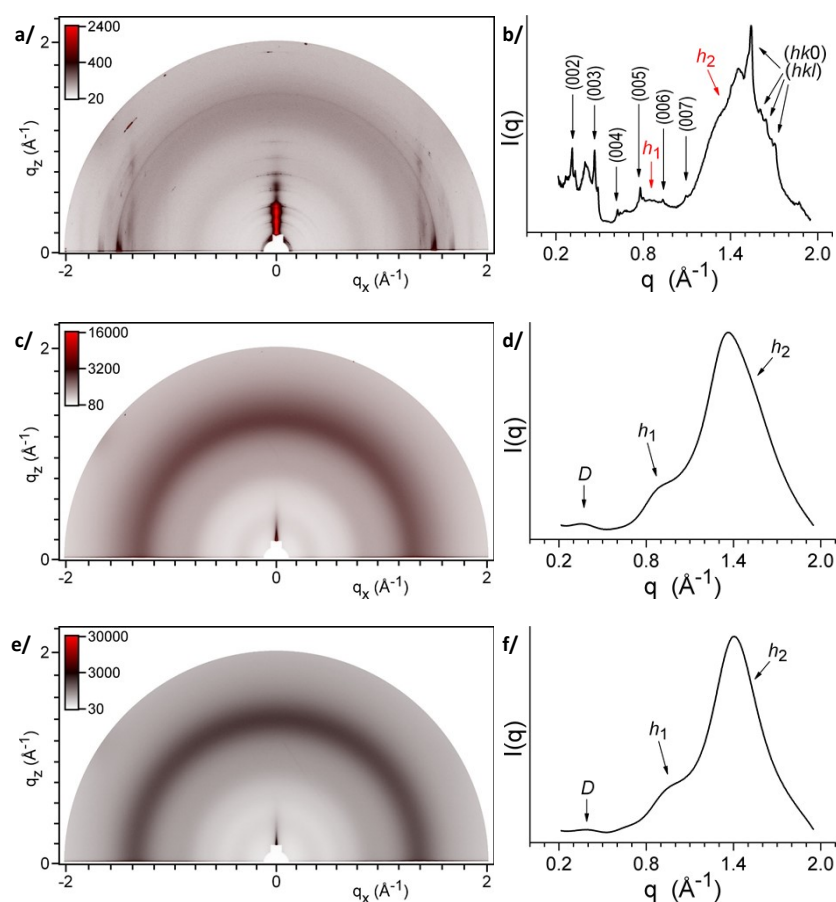

**Figure S4** | GIWAXS pattern (a/, c/ and e/) and the corresponding radial profile (b/, d/ and f/) of compound **1** (a/ and b/), **2** (c/ and d/) and **3** (e/ and f/).

The GIWAXS pattern (Fig S4 a/) and the corresponding radial profile (Fig S4 b/) of the pristine **1** film display coexistence of two phases: i) an amorphous phase (two broad scattering rings with maximums at  $q = 0.8$  and  $1.4$  Å<sup>-1</sup>, for average lateral distances  $h_1, h_2 = 2\pi/q = 7.8, 4.5$  Å) and ii) a lamellar crystalline phase (orders  $(00l)$  of the lamellar periodicity  $d = 40.5$  Å and reflections  $(hk0)$  and  $(hkl)$  of the in-plane arrangement and the three-dimensional structure). There is naturally no orientation of amorphous domains, while the crystalline domains adopt orientations with lamellae parallel to substrate.

The GIWAXS pattern (Fig S4 c/) and the corresponding radial profile (Fig S4 d/) of the pristine **2** film reveal an amorphous film, giving rise to broad rings from lateral distances between segments ( $h_1, h_2 = 6.6, 4.5 \text{ \AA}$ ), and a broad small-angle ring from packing of entire molecules ( $D = 17 \text{ \AA}$ ). The GIWAXS pattern (Fig S4 e/) and the corresponding radial profile (Fig S4 f/) of the pristine **3** film reveal an amorphous film, giving rise to broad rings from lateral distances between segments ( $h_1, h_2 = 6.3, 4.5 \text{ \AA}$ ), and a broad small-angle ring from packing of entire molecules ( $D = 17 \text{ \AA}$ ).

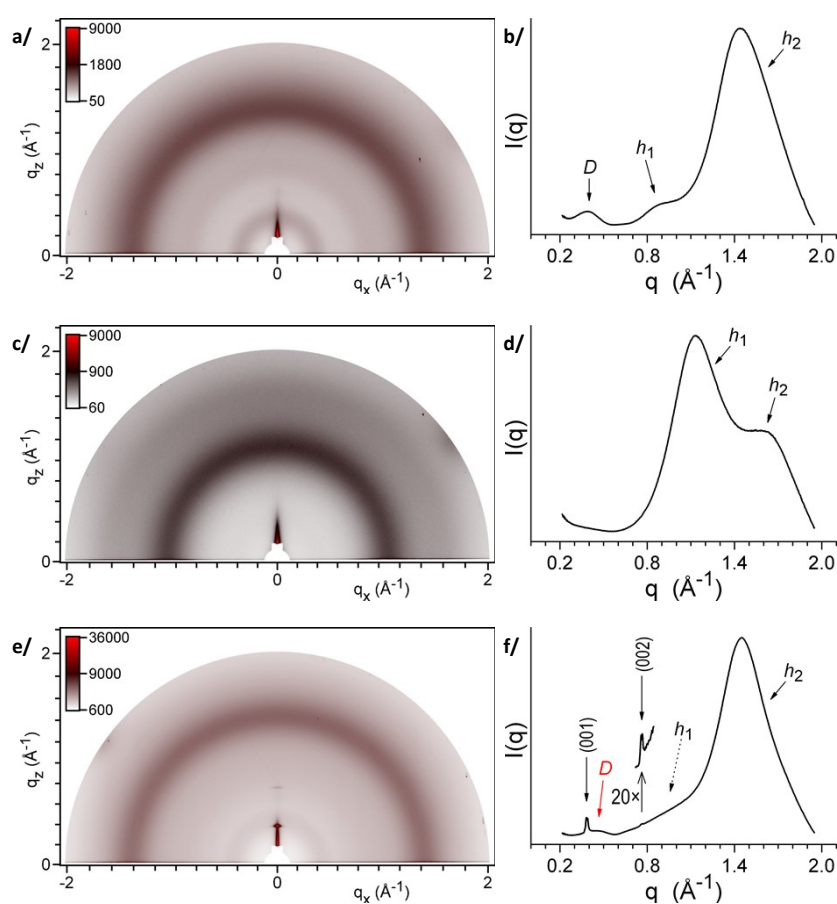

**Figure S5** | GIWAXS pattern (a/, c/ and e/) and the corresponding radial profile (b/, d/ and f/) of compound **4** (a/ and b/), **5** (c/ and d/) and **6** (e/ and f/).



The GIWAXS pattern (Fig S5 a/) and the corresponding radial profile (Fig S5 b/) of the pristine **4** film reveal an amorphous film, giving rise to broad rings from lateral distances between segments ( $h_1, h_2 = 6.6, 4.3 \text{ \AA}$ ), and a broad small-angle ring from packing of entire molecules ( $D = 16 \text{ \AA}$ ).

The GIWAXS pattern (Fig S5 c/) and the corresponding radial profile (Fig S5 d/) of the pristine **5** film reveal an amorphous film, giving rise to only two broad rings, with maximums at  $q = 1.1$  and  $1.6 \text{ \AA}^{-1}$  ( $h_1, h_2 = 5.6, 4.0 \text{ \AA}$ ) from lateral distances between molecular segments.

The GIWAXS pattern (Fig S5 e/) and the corresponding radial profile (Fig S5 f/) of the pristine **6** film display a smectic like structure with two sharp orders of a lamellar periodicity ( $d = 16.3 \text{ \AA}$ ) generated by the alternation of aliphatic chain and aromatic core layers, besides broad rings from liquid-like lateral distances within layers ( $h_2 = 4.3 \text{ \AA}$ ). The reflections align onto the meridian, which indicates that lamellae are oriented parallel to substrate. A continuous broad ring ( $D = 14 \text{ \AA}$ ) moreover appears in the small-angle region, due to the liquid-like molecular packing within amorphous domains that coexist with the mesomorphic domains.

## 5. Spectroscopic ellipsometry measurement

The alpha SE spectroscopic ellipsometer was used at incident angle  $70^\circ$  to measure  $\Psi$  and  $\Delta$  of the thin film from 380nm to 900nm. The rotating polarizer, photo-elastic modulator modulates between P-pol and S-pol from which the reflection ratio provides the information to unravel the dielectric index values of the thin films through Fresnel coefficient calculation. See Figure 5 for the dielectric permittivity spectra of all the six Curc series films. See Figures S6 for  $\Psi$  and  $\Delta$  measurement and fitted data. See Figure S7 for the refractive index  $n$  and absorption coefficient  $k$  of all the six Curc series films. Model fitting parameters of the measured data are shown in Table S4 to 11. Each film is fitted from a substrate/transparent thin film/air model. Fitting is conducted through the sum of oscillator functions such as Gaussian and Tauc-Lorentz oscillators.

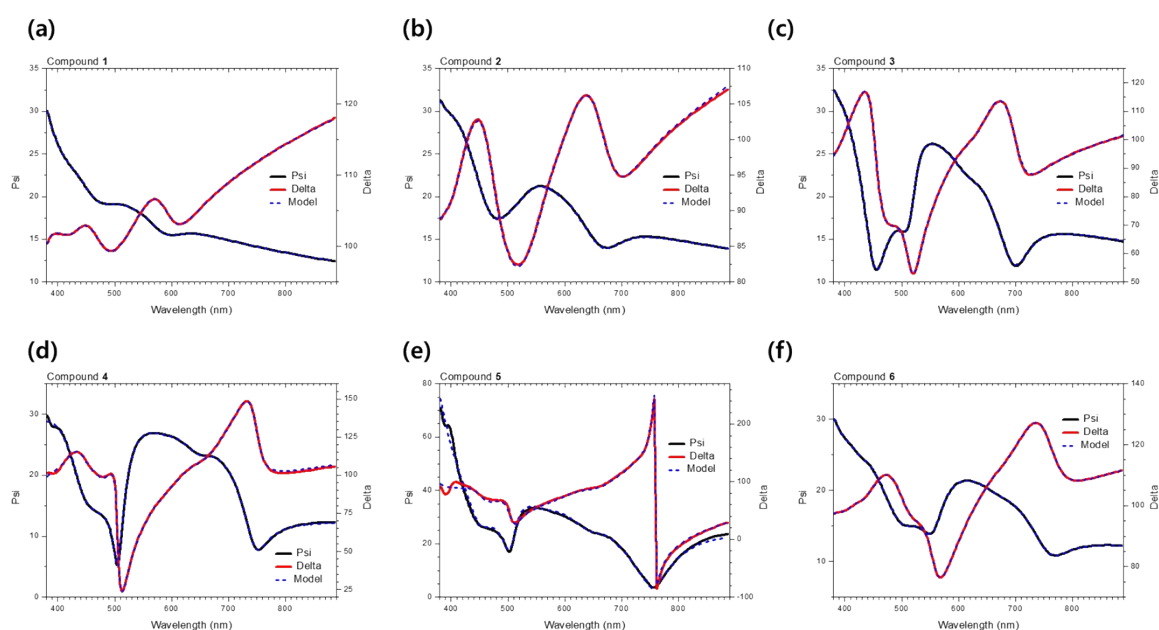

**Figure S6** | Measured  $\Psi$ , black, and  $\Delta$ , red, spectroscopic ellipsometry data and fitted model, dashed blue of six Curc series films.

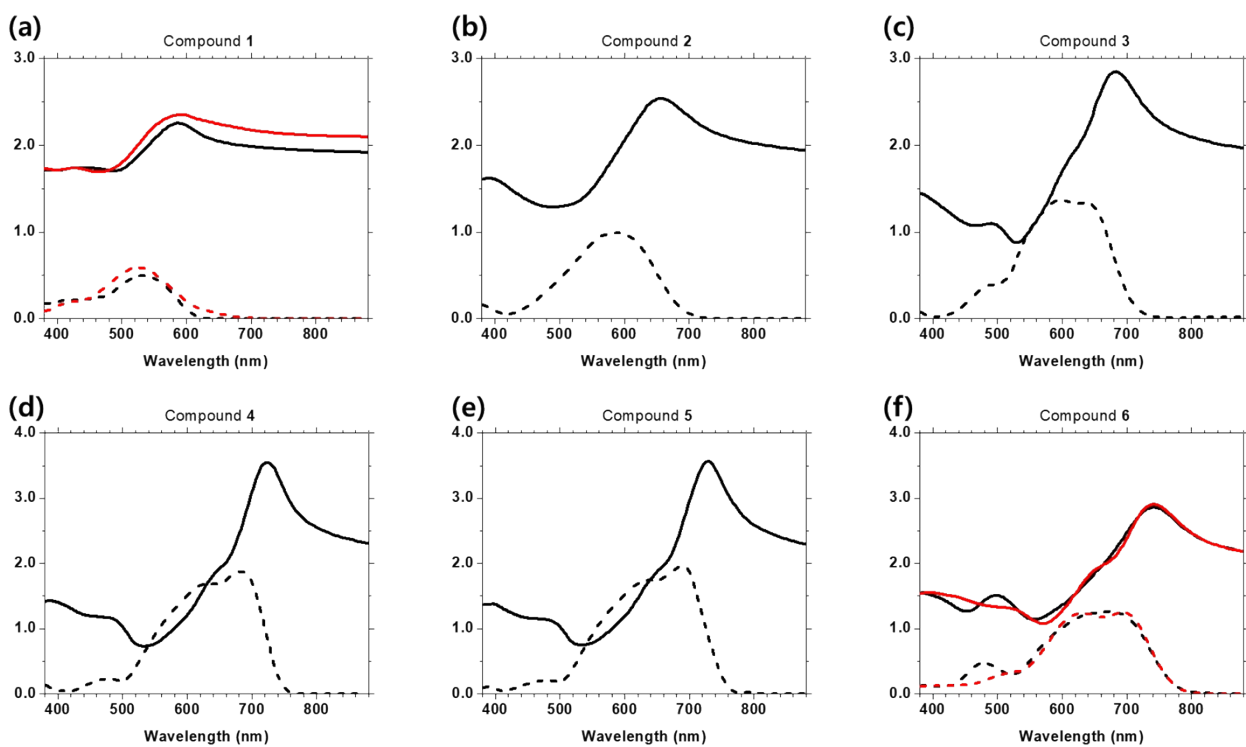

**Figure S7|** Refractive index  $n$  (solid curve) and absorption coefficient  $k$  (dashed curve) of all the six Curc series films are plotted. In (a) and (f) black and red curves correspond to ordinary and extra-ordinary components.

**Table S4.** Oscillator list for in-plane compound **1** dielectric permittivity

| In-plane |          |           |            |               |
|----------|----------|-----------|------------|---------------|
| Number   | Type     | Amplitude | Broadening | Center energy |
| 1        | Gaussian | 0.559     | 0.204      | 2.149         |
| 2        | Gaussian | 1.400     | 0.204      | 2.216         |
| 3        | Gaussian | 1.181     | 0.260      | 2.366         |
| 4        | Gaussian | 0.966     | 0.346      | 2.547         |
| 5        | Gaussian | 0.502     | 0.508      | 2.971         |
| 6        | Gaussian | 1.089     | 1.288      | 4.325         |

**Table S5.** Oscillator list for out-of-plane compound **1** dielectric permittivity

| Out-of-plane |          |           |            |               |
|--------------|----------|-----------|------------|---------------|
| Number       | Type     | Amplitude | Broadening | Center energy |
| 1            | Gaussian | 0.523     | 0.208      | 2.150         |
| 2            | Gaussian | 1.421     | 0.195      | 2.193         |
| 3            | Gaussian | 1.258     | 0.257      | 2.361         |
| 4            | Gaussian | 0.975     | 0.330      | 2.531         |
| 5            | Gaussian | 0.572     | 0.608      | 2.923         |
| 6            | Gaussian | 0.550     | 0.576      | 3.823         |

**Table S6.** Oscillator list for compound **2** dielectric permittivity

| Number | Type     | Amplitude | Broadening | Center energy |
|--------|----------|-----------|------------|---------------|
| 1      | Gaussian | 2.410     | 0.206      | 1.957         |
| 2      | Gaussian | 2.539     | 0.268      | 2.102         |
| 3      | Gaussian | 1.268     | 0.323      | 2.269         |
| 4      | Gaussian | 0.798     | 0.409      | 2.508         |
| 5      | Gaussian | 0.569     | 0.499      | 3.338         |
| 6      | Gaussian | 0.076     | 0.228      | 2.806         |

**Table S7.** Oscillator list for compound **3** dielectric permittivity

| Number | Type         | Amplitude | Broadening | Center energy |
|--------|--------------|-----------|------------|---------------|
| 1      | Gaussian     | 4.043     | 0.152      | 1.873         |
| 2      | Gaussian     | 4.632     | 0.274      | 2.028         |
| 3      | Gaussian     | 1.187     | 0.208      | 2.241         |
| 4      | Gaussian     | 0.655     | 0.339      | 2.488         |
| 5      | Gaussian     | 0.435     | 0.377      | 3.444         |
| 6      | Gaussian     | 0.268     | 0.417      | 2.662         |
| 7      | Tauc-Lorentz | 1.237     | 21.157     | 0.482         |

**Table S8.** Oscillator list for compound **4** dielectric permittivity

| Number | Type         | Amplitude | Broadening | Center energy |
|--------|--------------|-----------|------------|---------------|
| 1      | Gaussian     | 4.653     | 0.093      | 1.746         |
| 2      | Gaussian     | 5.668     | 0.122      | 1.800         |
| 3      | Gaussian     | 4.751     | 0.204      | 1.915         |
| 4      | Gaussian     | 2.389     | 0.273      | 2.082         |
| 5      | Gaussian     | 0.515     | 0.223      | 2.311         |
| 6      | Gaussian     | 0.282     | 0.181      | 2.566         |
| 7      | Gaussian     | 0.306     | 0.252      | 2.715         |
| 8      | Gaussian     | 13.169    | 0.733      | 4.096         |
| 9      | Tauc-Lorentz | 32.099    | 0.088      | 1.690         |

**Table S9.** Oscillator list for compound **5** dielectric permittivity

| Number | Type     | Amplitude | Broadening | Center energy |
|--------|----------|-----------|------------|---------------|
| 1      | Gaussian | 4.670     | 0.093      | 1.726         |
| 2      | Gaussian | 6.101     | 0.123      | 1.787         |
| 3      | Gaussian | 5.068     | 0.243      | 1.911         |
| 4      | Gaussian | 1.718     | 0.339      | 2.125         |
| 5      | Gaussian | 0.338     | 0.259      | 2.626         |

**Table S10.** Oscillator list for in-plane compound **6** dielectric permittivity

| In-plane |              |           |            |               |
|----------|--------------|-----------|------------|---------------|
| Number   | Type         | Amplitude | Broadening | Center energy |
| 1        | Gaussian     | 1.316     | 0.122      | 1.695         |
| 2        | Gaussian     | 2.590     | 0.157      | 1.756         |
| 3        | Gaussian     | 3.467     | 0.260      | 1.859         |
| 4        | Gaussian     | 2.089     | 0.353      | 2.066         |
| 5        | Gaussian     | 1.150     | 0.323      | 2.570         |
| 6        | Gaussian     | 0.413     | 2.034      | 3.589         |
| 7        | Gaussian     | 47.977    | 0.025      | 0.024         |
| 9        | Tauc-Lorentz | 498.222   | 3.343      | 0.001         |

**Table S11.** Oscillator list for out-of-plane compound **6** dielectric permittivity

| Out-of-plane |              |           |            |               |
|--------------|--------------|-----------|------------|---------------|
| Number       | Type         | Amplitude | Broadening | Center energy |
| 1            | Gaussian     | 2.408     | 0.146      | 1.715         |
| 2            | Gaussian     | 3.008     | 0.160      | 1.755         |
| 3            | Gaussian     | 3.023     | 0.218      | 1.894         |
| 4            | Gaussian     | 2.175     | 0.277      | 2.027         |
| 5            | Gaussian     | 0.653     | 0.371      | 2.335         |
| 6            | Gaussian     | 0.365     | 0.460      | 2.587         |
| 7            | Gaussian     | 0.071     | 0.173      | 2.867         |
| 8            | Gaussian     | 0.390     | 0.567      | 3.158         |
| 9            | Tauc-Lorentz | 0.755     | 23.365     | 8.587         |

## 6. Reflection, transmission, absorption measurements and simulation data

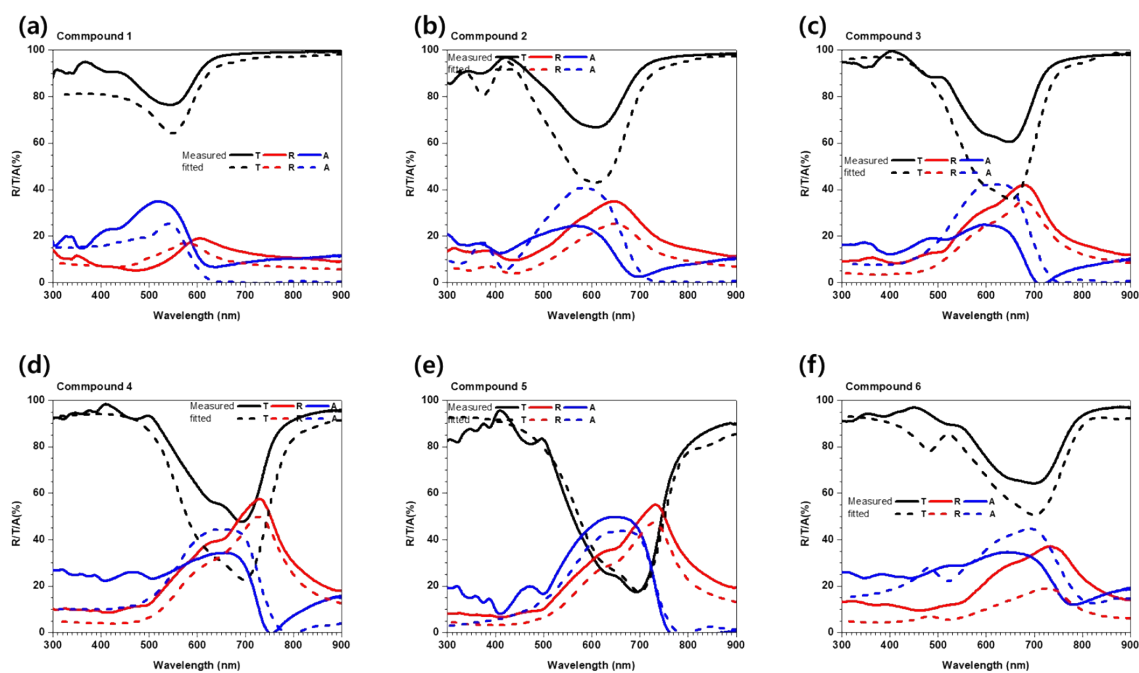

**Figure S8|** Measured data of six Curc series films (solid line) and simulated data (dashed line). Simulation data is obtained by use of dielectric permittivity spectrum of Figure 5.
